# Supplementary material for: SNARE assembly enlightened by cryo-EM structures of a synaptobrevin–Munc18-1–syntaxin-1 complex
Source: PubMed Central journal article supplement — Sci Adv. 2022 Jun 22;8(25):eabo5272. doi: 10.1126/sciadv.abo5272 (PMC9216511; doi:10.1126/sciadv.abo5272), 2022-06-22
Supplement: sciadv.abo5272_sm.pdf [file sciadv.abo5272_sm.pdf]

Supplementary Materials for  
**SNARE assembly enlightened by cryo-EM structures of a  
synaptobrevin–Munc18-1–syntaxin-1 complex**

Karolina P. Stepien *et al.*

Corresponding author: Josep Rizo, jose.rizo-rey@utsouthwestern.edu;  
Xiao-Chen Bai, xiaochen.bai@utsouthwestern.edu

*Sci. Adv.* **8**, eabo5272 (2022)  
DOI: 10.1126/sciadv.abo5272

**This PDF file includes:**

Figs. S1 to S12  
Tables S1 to S3

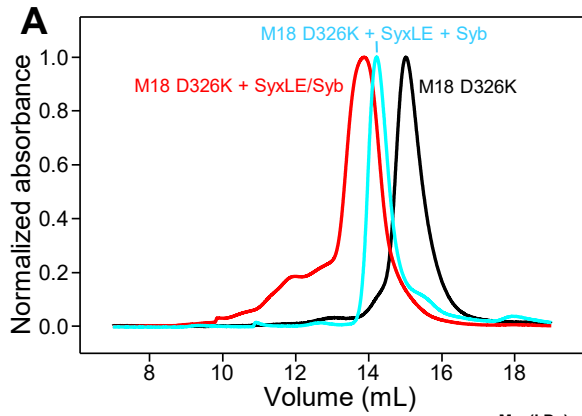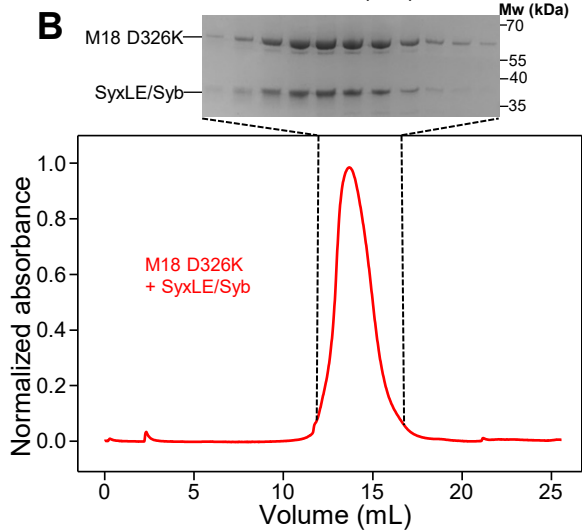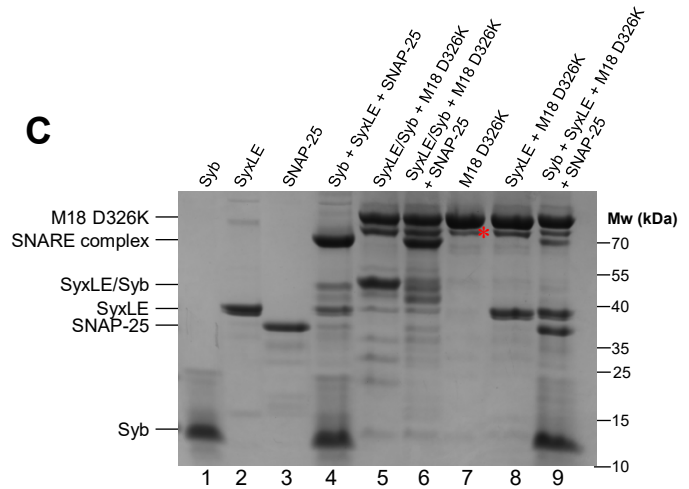

**Fig. S1.** Preparation of the template complex. **(A)** Gel filtration on Superdex S200 of Munc18-1 D326K alone (black curve) or after overnight incubation with SyxLE/Syb (red curve) or after overnight incubation with non-cross-linked SyxLE plus Syb (blue curve). The absorbance at 280 nm was normalized to the maximum absorbance observed in each chromatogram. **(B)** Gel filtration of an equimolar mixture of Munc18-1 D326K and SyxLE/Syb used to purify the template complex. SDS-PAGE analysis of the eluted fractions containing the complex is shown above the chromatogram. **(C)** SDS-PAGE analysis of SNARE complex assembly. The lanes were loaded with different mixtures Syb, SyxLE, SNAP-25, Munc18-1 D326K (M18 D326K) and SyxLE/Syb in different combinations as indicated at the top. All samples were incubated for three minutes at room temperature before loading onto the gel. Formation of the SDS-resistant SNARE complex was much more efficient for the mixture containing SyxLE/Syb, SNAP-25 and M18 D326K (lane 6) than that containing Syb, SyxLE, SNAP-25 and M18 D326K (lane 9). The positions of the proteins and complexes are indicated on the left, and those of molecular weight markers on the right. A common degradation band of Munc18-1 is indicated with a \*, but note that such degradation is common in Munc18-1 and does not prevent syntaxin-1 binding (8).

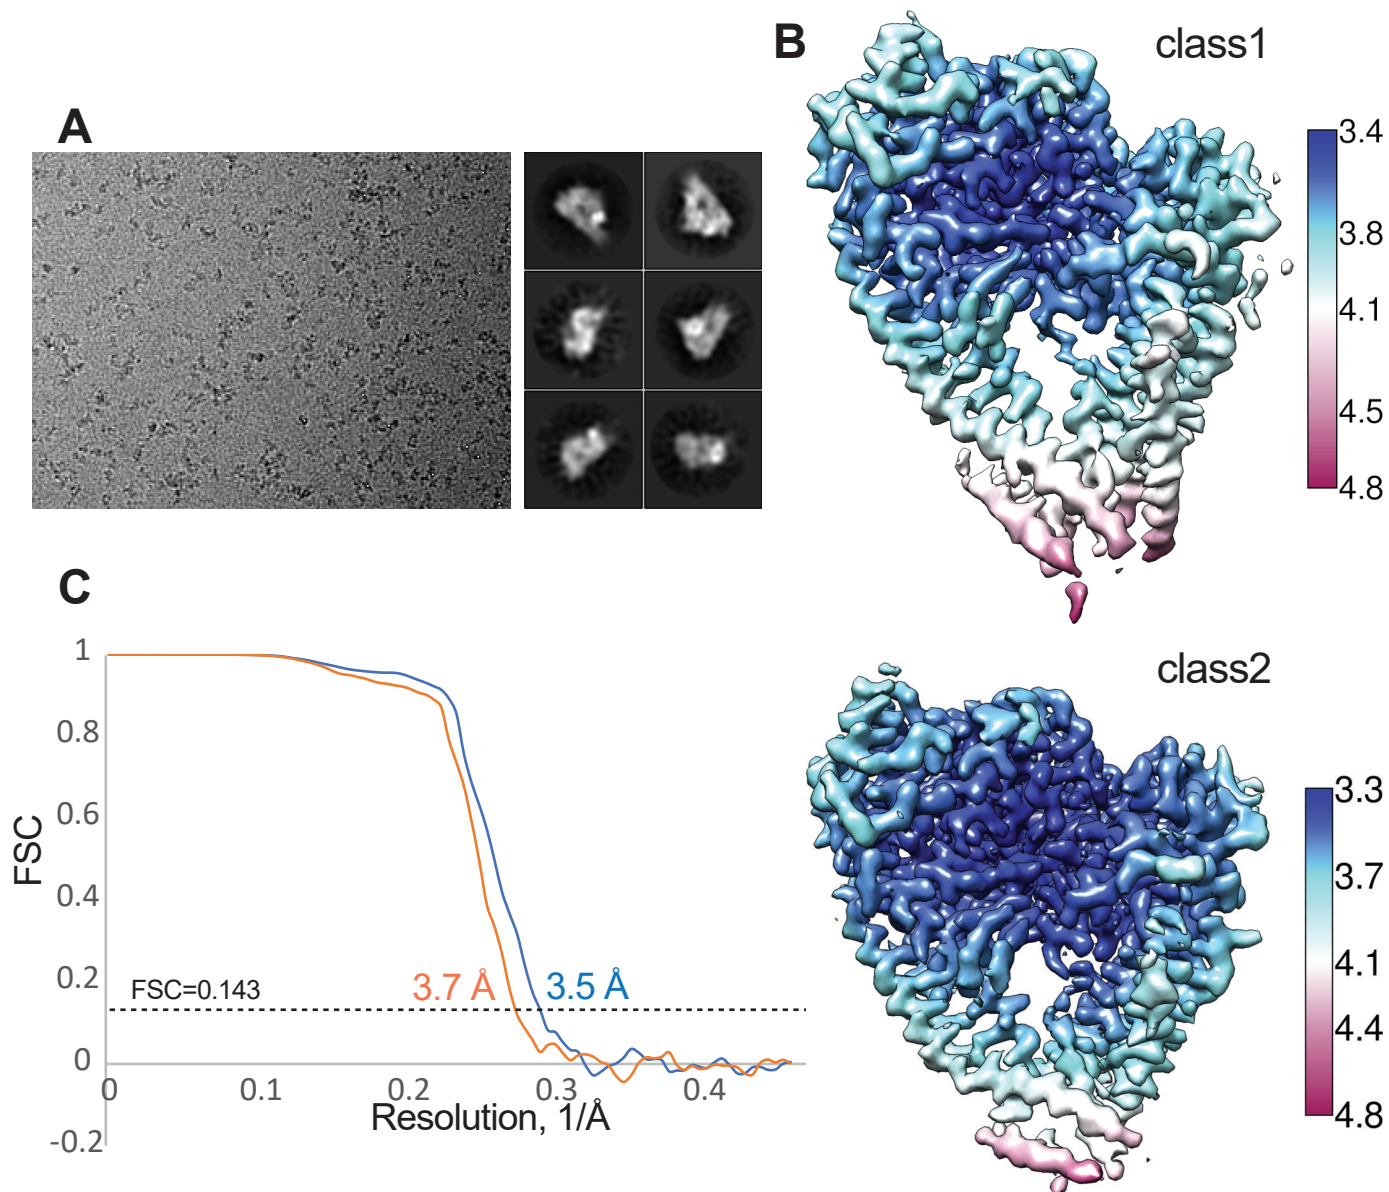

**Figure S2.** Cryo-EM analysis of the template complex. **(A)** Representative electron micrograph from a total 7,401 images acquired and 2D class averages of the template complex. **(B)** Cryo-EM maps of the two conformers of the template complex (class1 and class2) colored by local resolution. The color scales are in Å **(C)**. Gold-standard Fourier shell correlation (FSC) curve for the cryo-EM maps of the template complex. Red: class1; blue: class2.

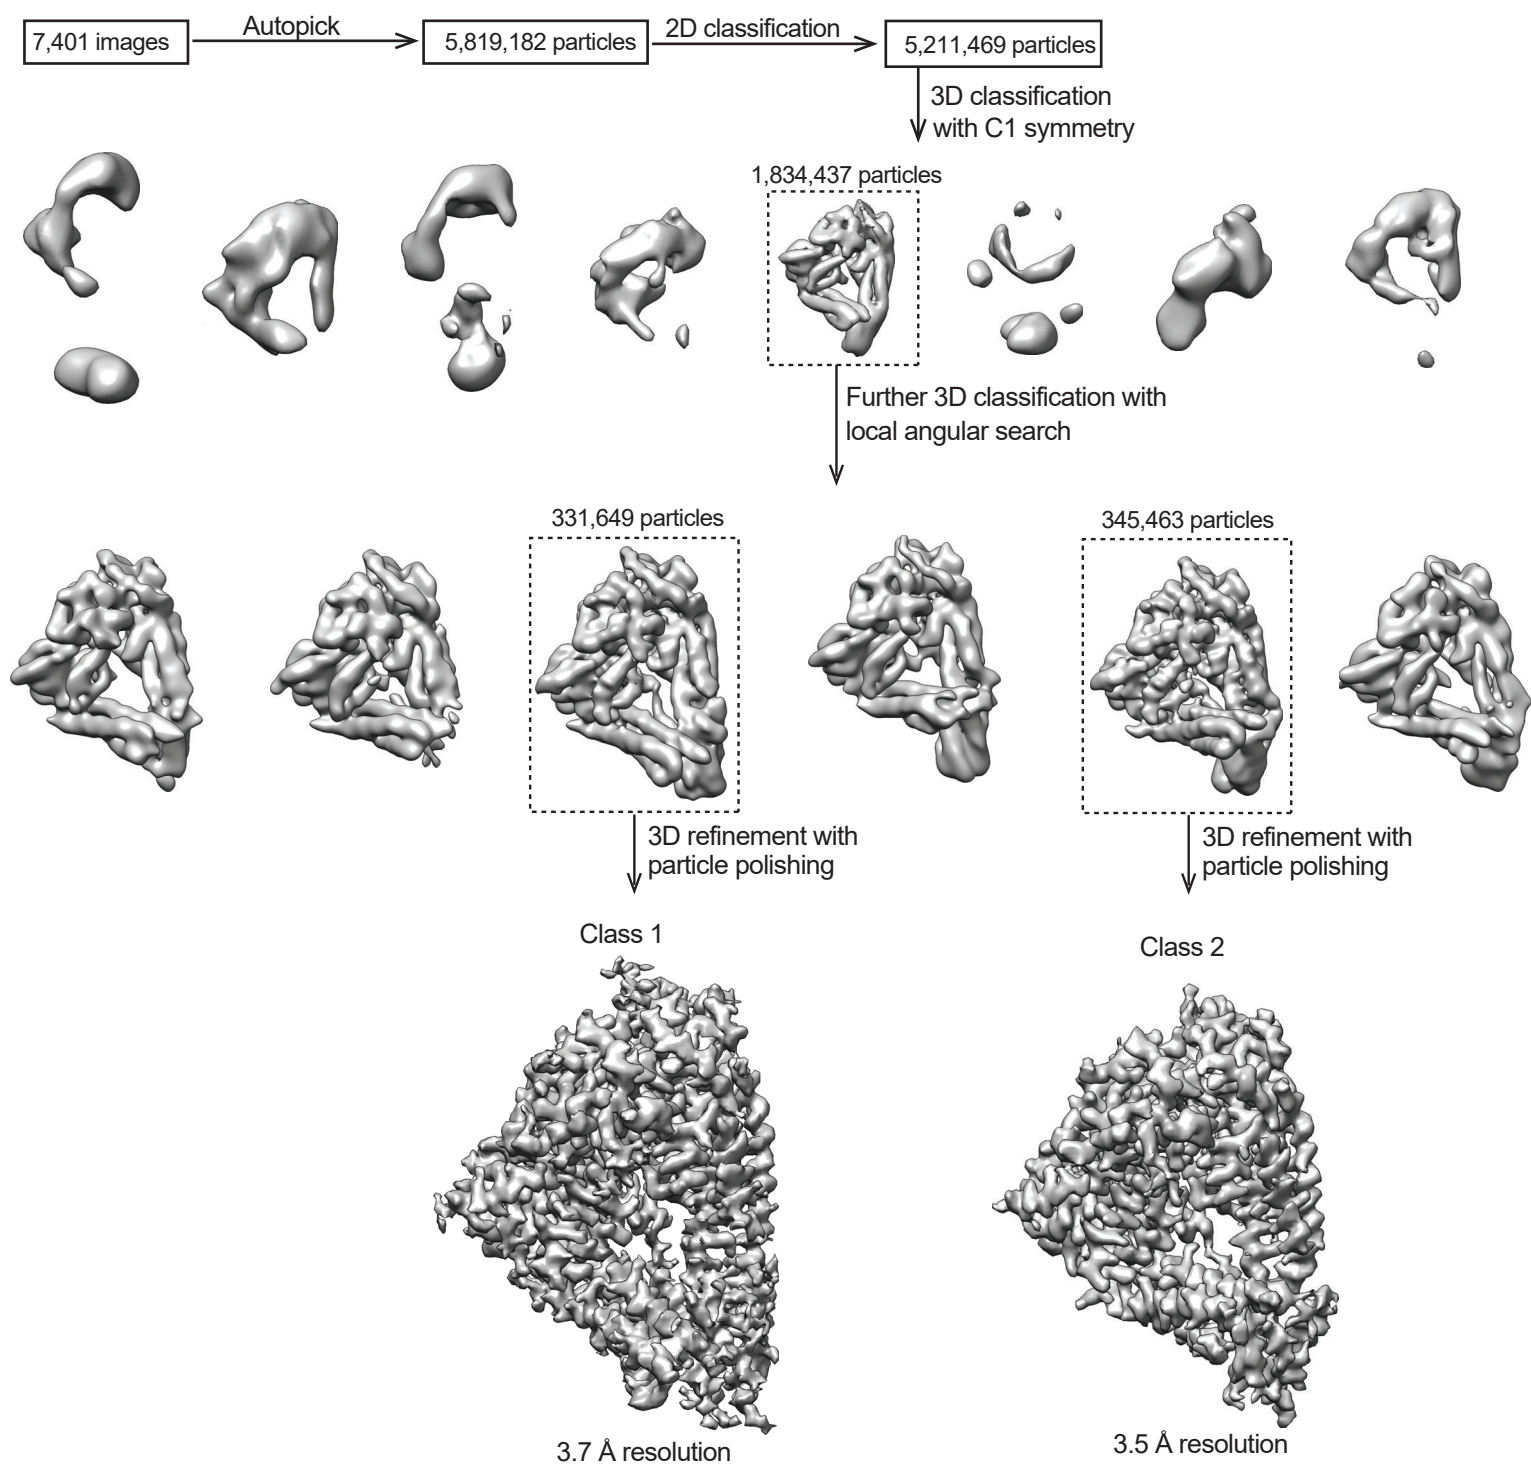

**Figure S3.** Flow-chart of cryo-EM data processing leading to the two conformers of the template complex (class1 and class2).

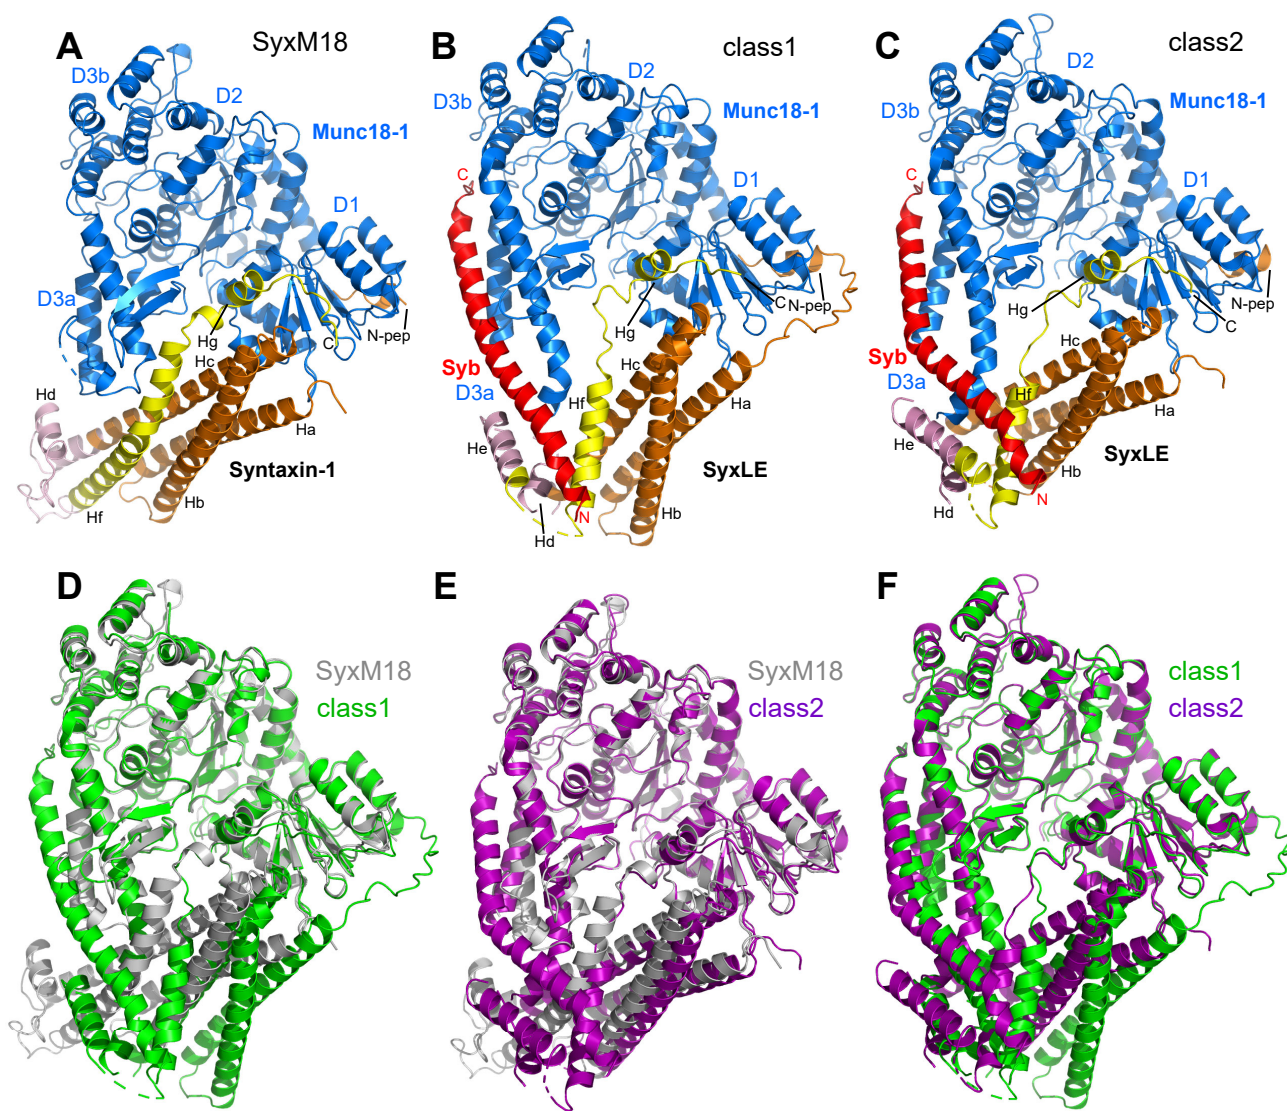

**Figure S4.** Structural comparison of class1, class2 and the syntaxin-1-Munc18-1 complex (SyxM18). (A-C) Ribbon diagrams of the structures of the syntaxin-1-Munc18-1 complex (SyxM18) (PDB code 3C98) (8, 34) (A), class1 (B) and class2 (C). The color code is the same as in Fig. 1D-F. The domains of Munc18-1 (D1, D2, D3a and D3b) are labeled. The syntaxin-1 helices are indicated (named Ha-Hg). (D-F) Superpositions of ribbon diagrams of SyxM18 (grey), class1 (green) and class2 (purple) using the Munc18-1 C $\alpha$  atoms for the superpositions. The root mean square (r.m.s.) deviations were the following: Munc18-1 versus class1 (D) 0.59 Å for 470 C $\alpha$  carbons; Munc18-1 versus class2 (E) 0.54 Å for 455 C $\alpha$  carbons; and class1 versus class2 (F) 0.38 Å for 474 C $\alpha$  carbons.

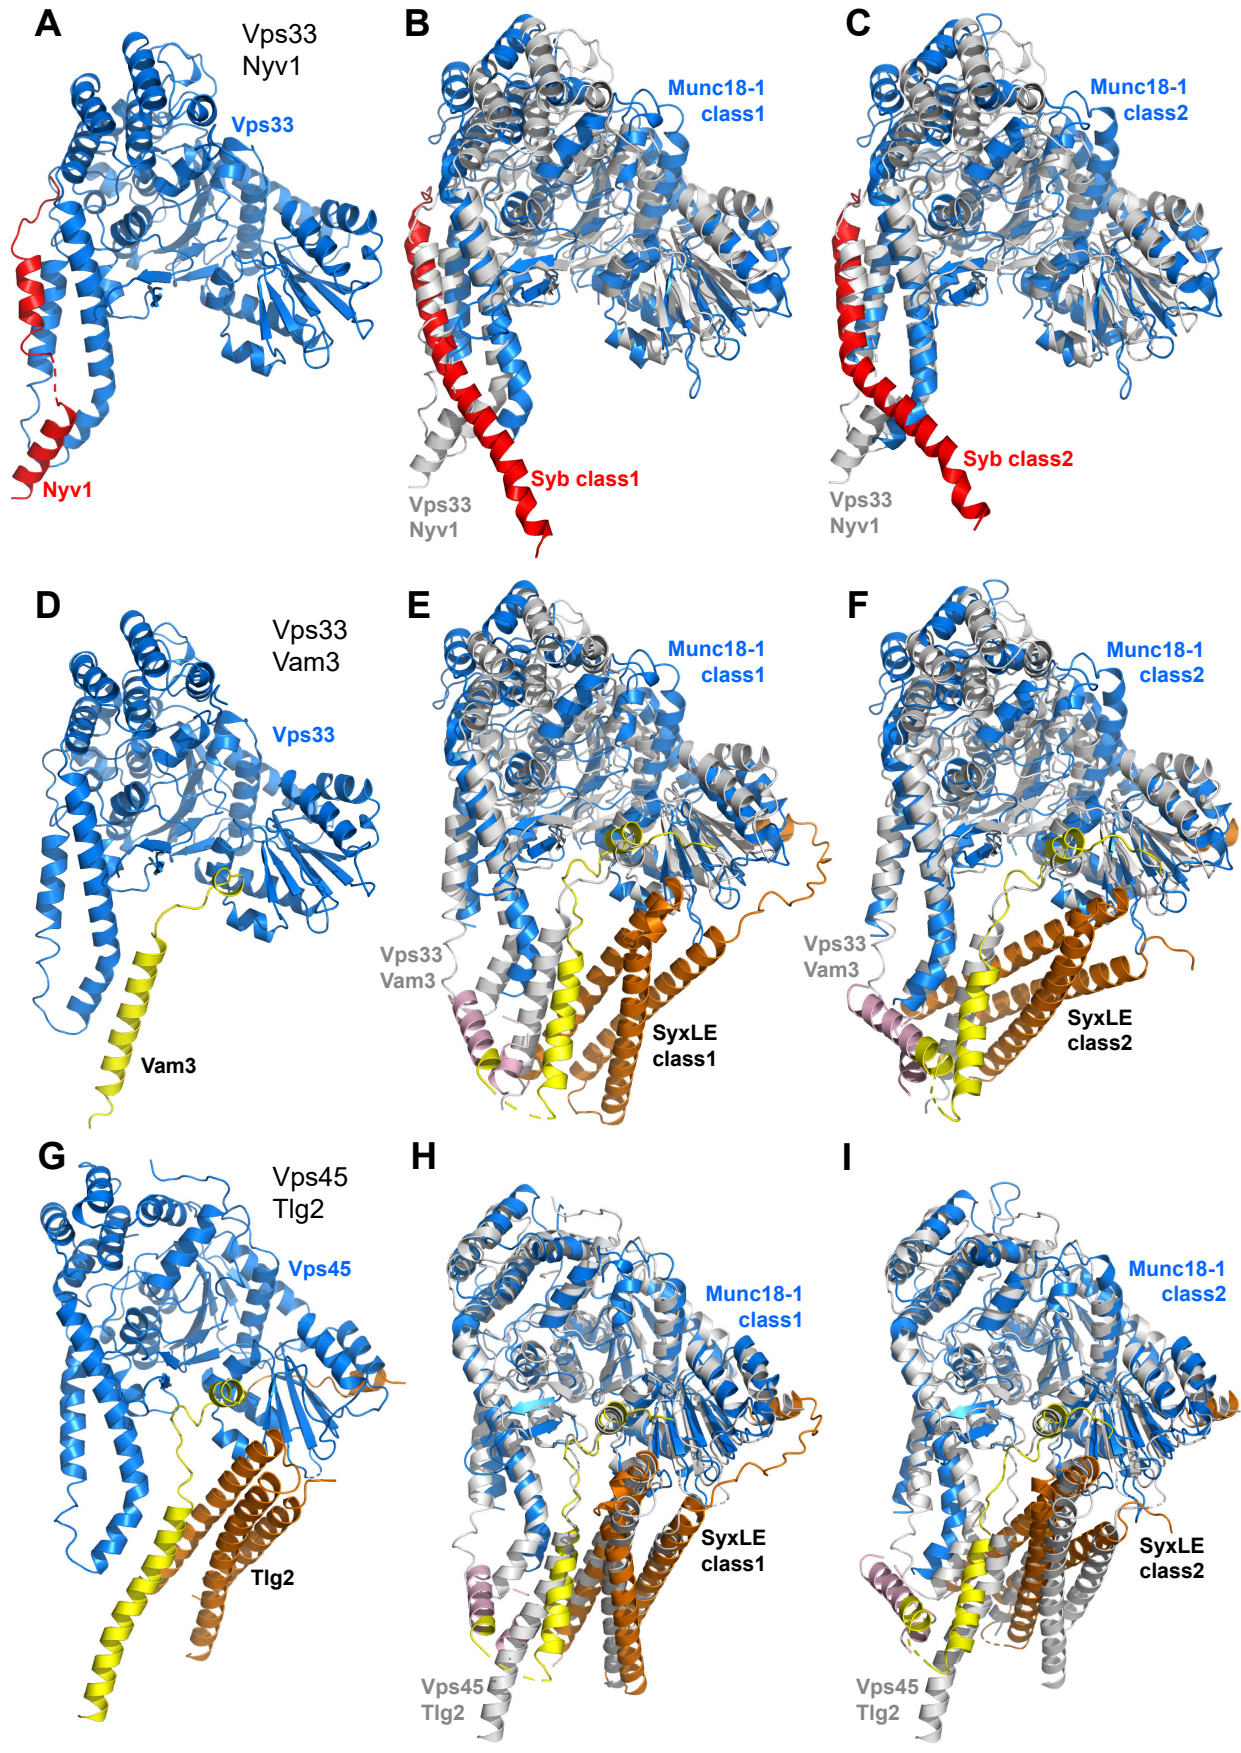

**Figure S5.** Structural comparisons of class1 and class 2 with the Vps33/Nyv1, Vps33/Vam3 and Vps45/Tlg2 complexes. **(A,D,G)** Ribbon diagrams of the structures of the Vps33-Nyv1 complex (PDB code 5BV0) (30) **(A)**, the Vps33-Vam3 complex (PDB code 5BUZ) (30) **(D)** and the Vps45-Tlg complex (PDB code 6XMD) (35) **(G)**. Note that the Vps33-Nyv1 and Vps33-Vam3 complexes also included Vps16, which is not shown for simplicity. Vps33 and Vps45 are shown in blue, Nyv1 in red, the Vam3 SNARE motif in yellow, and Tlg2 in orange ( $H_{abc}$  domain) and yellow (SNARE motif). **(B,C,E,F,H,I)** Superpositions of class1 and class2 with Vps33-Nyv1 **(B,C)**, Vps33-Vam3 **(E,F)** and Vps45-Tlg2 **(H,I)**. Vps33-Nyv1, Vps33-Vam3 and Vps45-Tlg2 are shown in gray. The color code for class1 and class 2 is the same as in Fig. 1. The superpositions were performed using corresponding  $C\alpha$  carbons of the SM proteins, yielding the following r.m.s. deviations: Vps33-Nyv1 versus class1: 4.91 Å for 394  $C\alpha$  carbons; Vps33-Nyv1 versus class2: 5.18 Å for 411  $C\alpha$  carbons; Vps33-Vam3 versus class1 4.47 Å for 379  $C\alpha$  carbons; Vps33-Vam3 versus class2 4.99 Å for 406  $C\alpha$  carbons; Vps45-Tlg2 versus class1 1.67 Å for 323  $C\alpha$  carbons; and Vps45-Tlg2 versus class2 1.80 Å for 323  $C\alpha$  carbons.

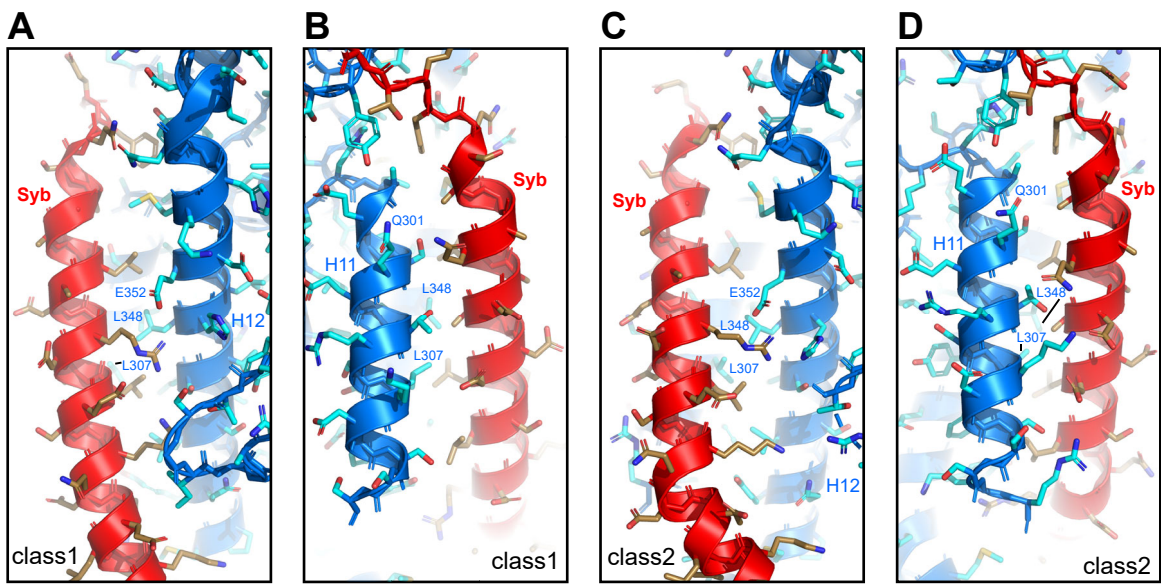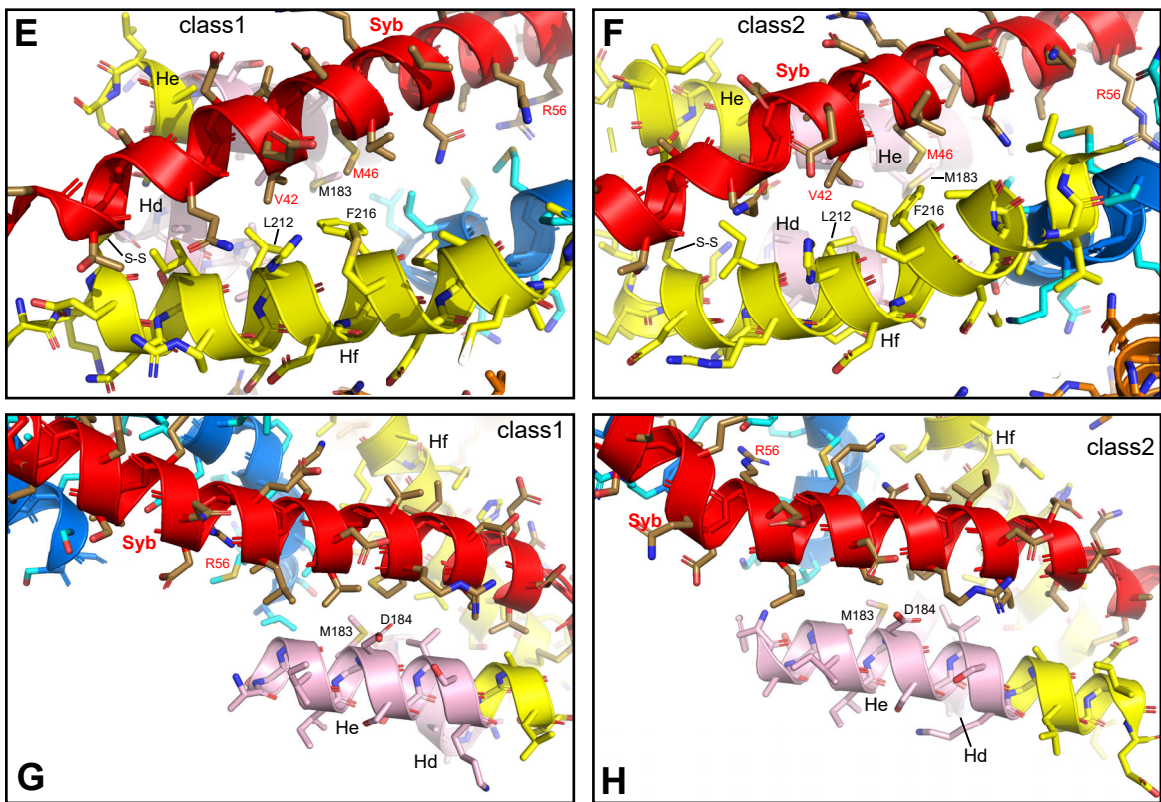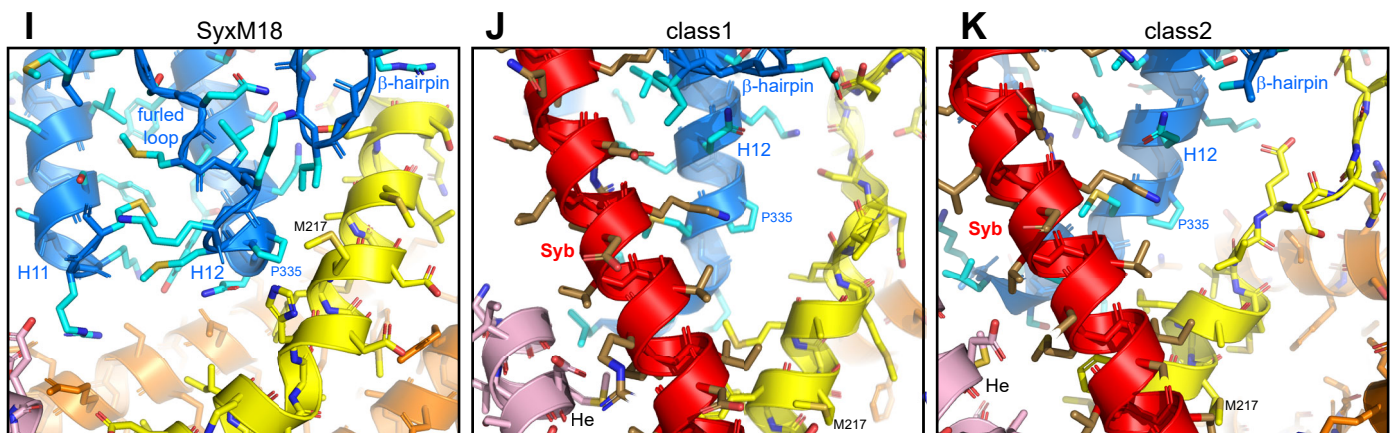



**Figure S6.** Interactions between different structural elements of Munc18-1, synaptobrevin and syntaxin-1 in class1 and class2. (A-K) The diagrams show close-up views of the regions where: synaptobrevin binds to Munc18-1 in class1 (A,B) and class2 (C,D); the syntaxin-1 linker forms a small four-helix bundle with the syntaxin-1 and synaptobrevin SNARE motifs in class1 (E,G) or class2 (F,H); P335 and a  $\beta$ -hairpin of Munc18-1 interact with or are close to the syntaxin-1 motif in the syntaxin-1-Munc18-1 complex (SyxM18) (I), class1 (J) or class2 (K) The structures are represented with ribbon diagrams [Munc18-1 in blue; synaptobrevin (Syb) in red; syntaxin-1 in orange (N-peptide and H<sub>abc</sub> domain), pink (linker) and yellow (SNARE motif)] and stick models with the following color code for side chain atoms: oxygen atoms red, nitrogen atoms blue, sulfur atoms light orange and carbon atoms in cyan for Munc18-1, brown for synaptobrevin and orange (H<sub>abc</sub> domain), pink (linker) or yellow (SNARE motif) for syntaxin-1. The positions of selected residues discussed in the text, selected helices of syntaxin-1, the disulfide bond linking syntaxin-1 and synaptobrevin, the furred loop and the  $\beta$ -hairpin are indicated in the relevant panels. The M217 side chain is labeled in panels I-K to show that the SNARE motif of syntaxin-1 is shifted downwards in class1 and class2 with respect to its position in the syntaxin-1-Munc18-1 complex.

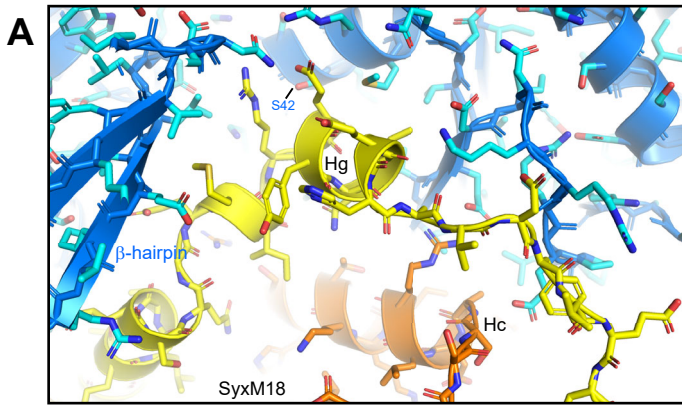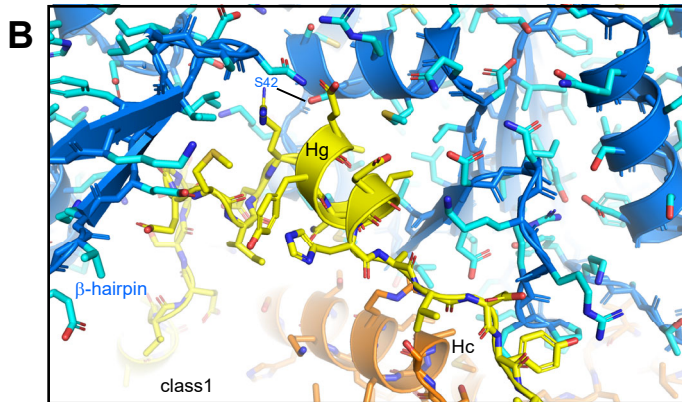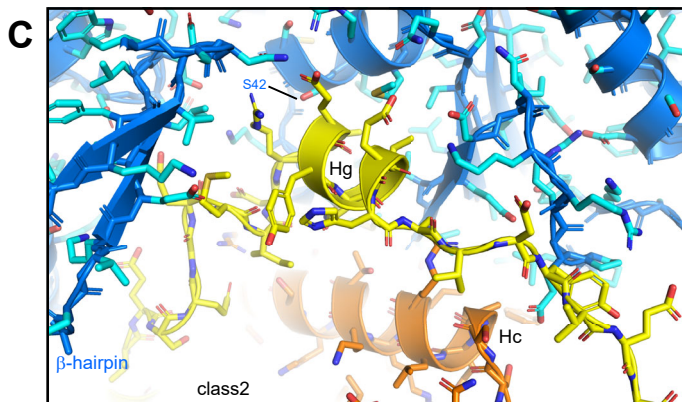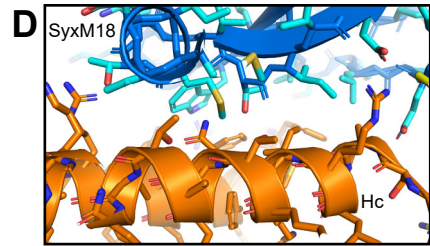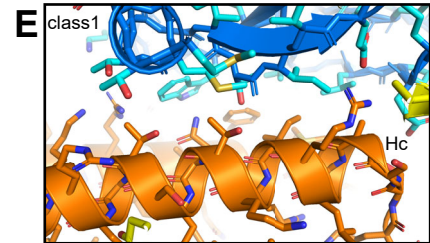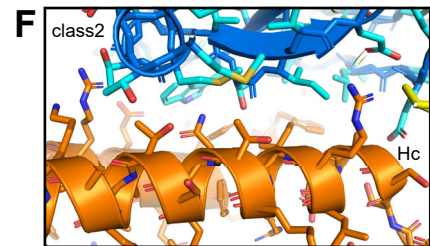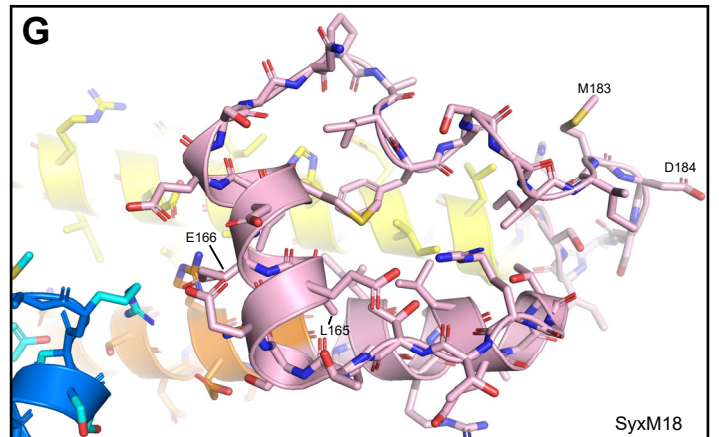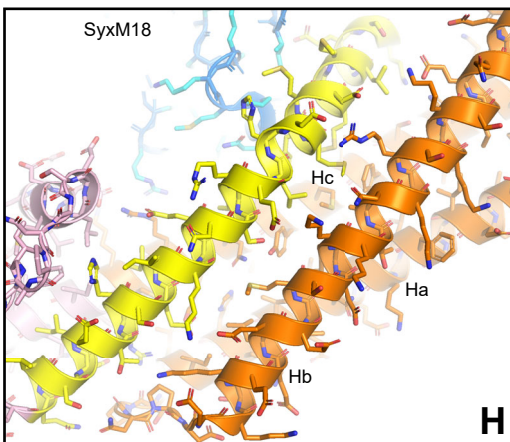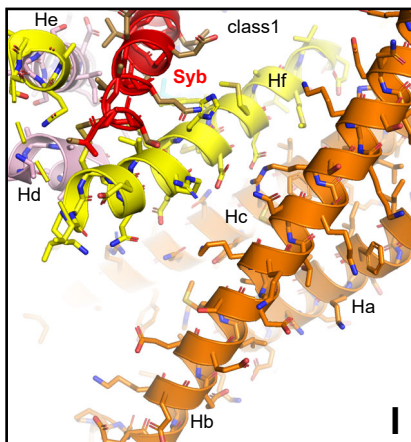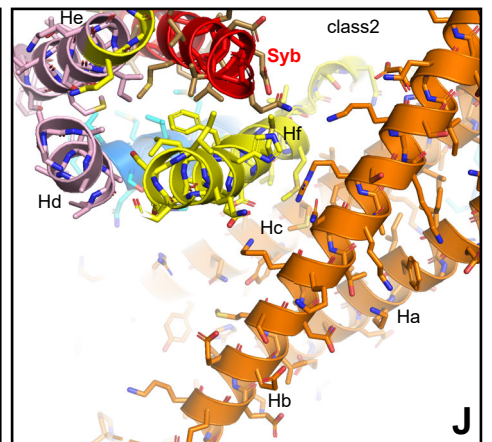

**Figure S7.** Comparison of interactions among Munc18-1, the syntaxin-1 SNARE motif and the H<sub>abc</sub> domain in the syntaxin-1-Munc18-1 (SyxM18) complex, class1 and class2. The diagrams show close-up views of the regions where: the C-terminal half of the syntaxin-1 SNARE motif binds to the Munc18-1 cavity in the syntaxin-1-Munc18-1 complex (SyxM18) (**A**), class1 (**B**) or class2 (**C**); the syntaxin-1 H<sub>abc</sub> domain binds to Munc18-1 in SyxM18 (**D**), class1 (**E**) or class2 (**F**); the syntaxin-1 linker packs against the SNARE motif in SyxM18 (**G**); and the syntaxin-1 SNARE motif interacts with the H<sub>abc</sub> domain in SyxM18 (**H**), class1 (**I**) or class2 (**J**). The structures are represented with ribbon diagrams and stick models with the same color coding as Fig. S6. The positions of selected helices and residues discussed in the text are indicated in the relevant panels. Panel (**G**) shows that residues L165 and E166, which are replaced in the LE mutation, are buried in SyxM18.

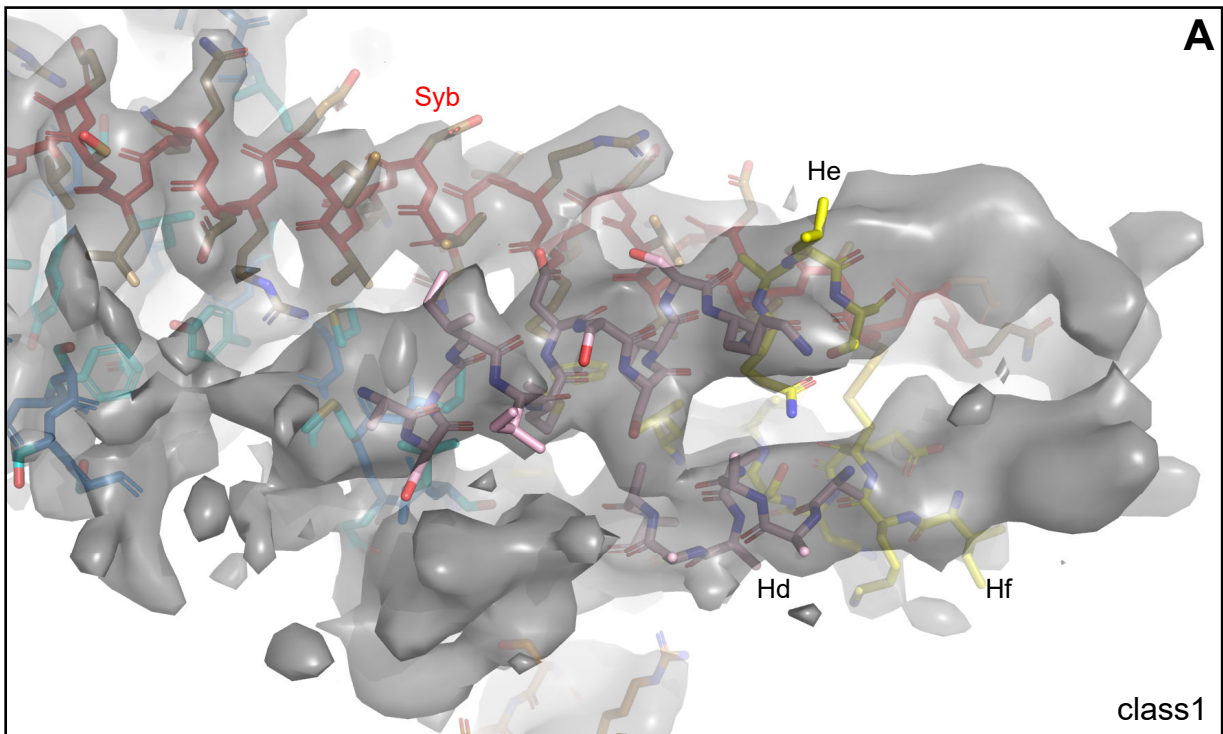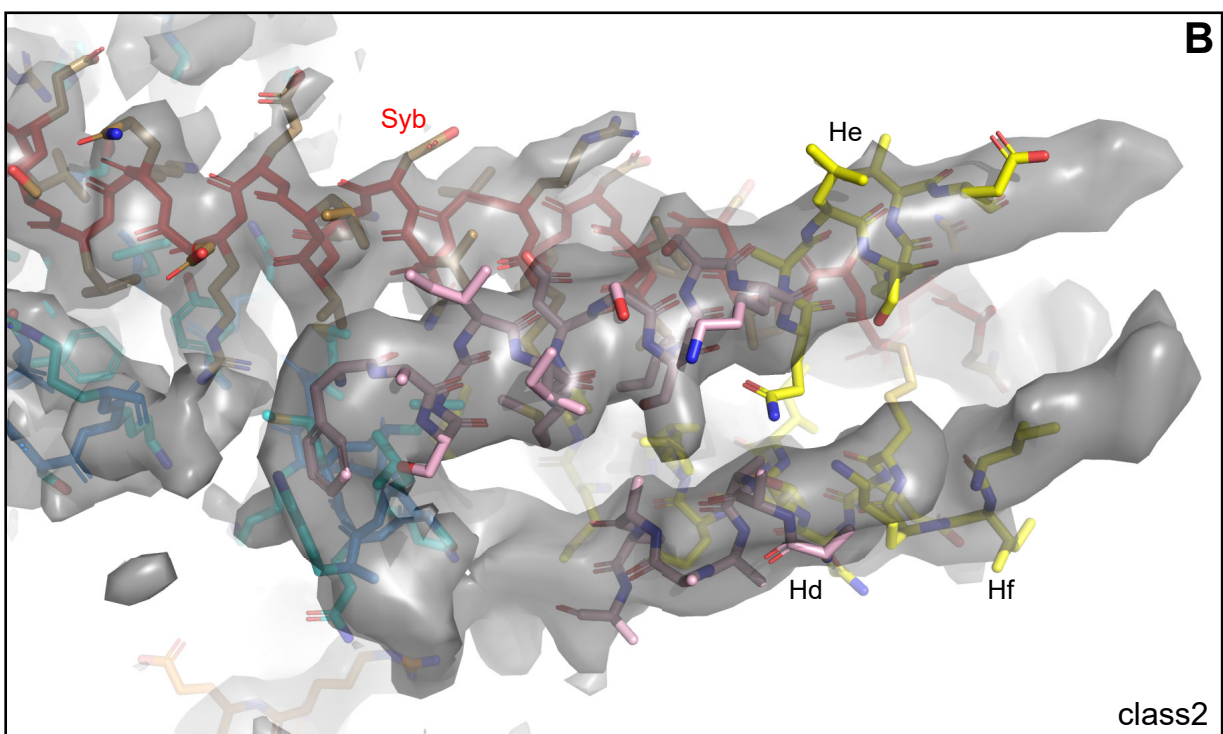

**Fig. S8.** Region around the short four-helix bundle of the Cryo-EM maps of class1 (**A**) and class2 (**B**). The modeled structures are represented by stick models with the same color coding as Fig. S6. The positions of the N-terminal half of the synaptobrevin SNARE motif (Syb) and helices Hd-Hf are indicated.

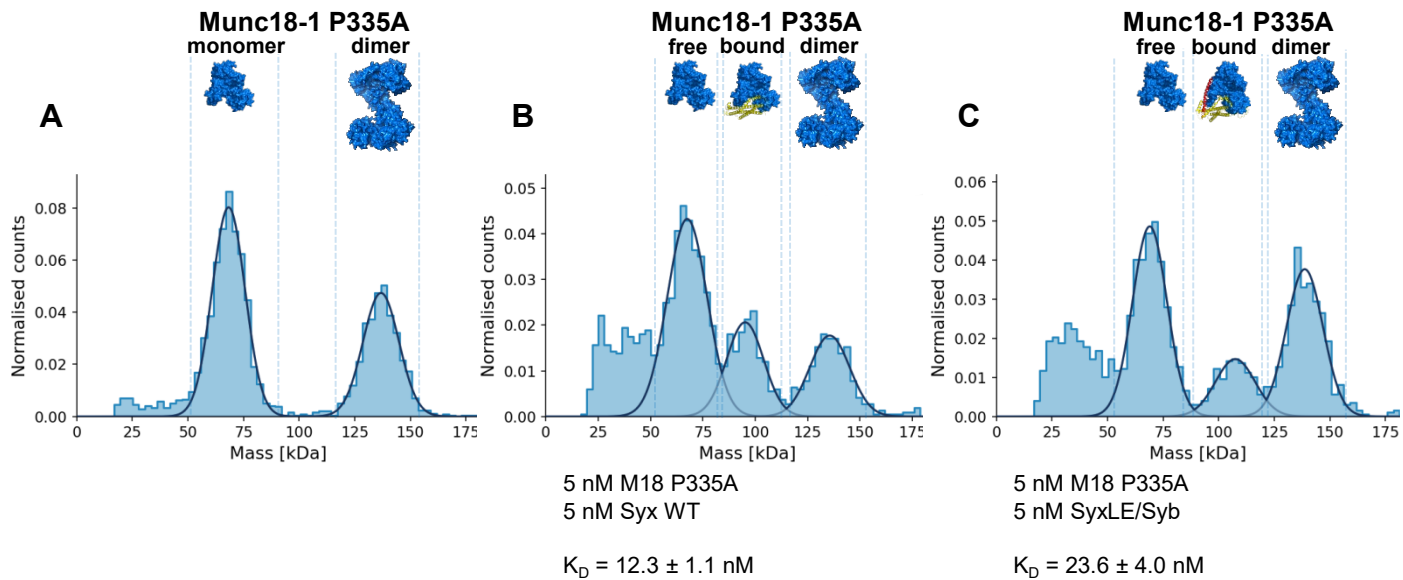

**Figure S9.** Analysis of Munc18-1 P335A mutant-SNARE interactions by mass photometry. (A-C) Normalized histograms of mass distributions observed for samples containing 5 nM Munc18-1 (M18) P335A mutant alone (A) or together with 5 nM WT syntaxin-1(2-253) (Syx) (B), or 5 nM SyxLE/Syb (C). Gaussian fits (solid lines) were used to calculate the populations of free and bound Munc18-1 P335A, and derive dissociation constants ( $K_D$ s).

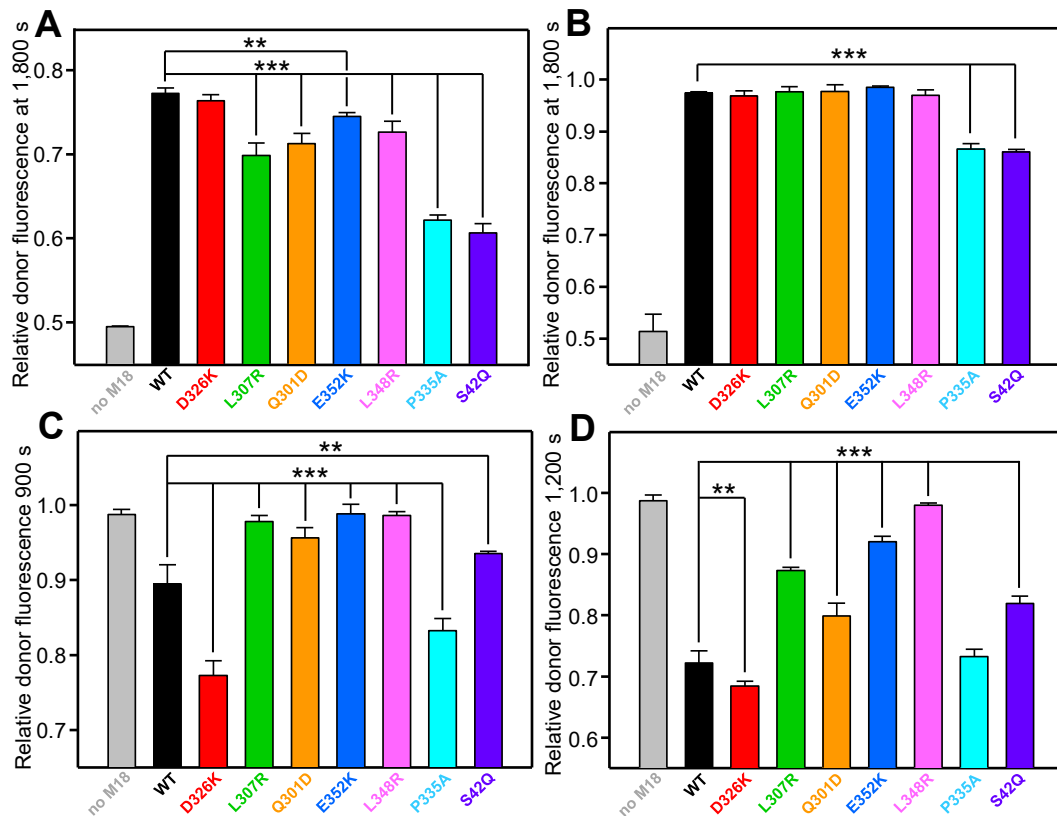

**Figure S10.** Quantification of the SNARE complex assembly assays at selected time points to highlight differences between the results obtained with different mutants. **(A,B)** Diagrams showing the relative donor fluorescence (normalized to the first time point) observed at 1,800 s in the SNARE complex assembly assays performed in solution with SyxMUN **(A)** or Syx **(B)** in the presence of WT or mutant Munc18-1 (corresponding to Fig. 4C and 4D, respectively). **(C,D)** Diagrams showing the relative donor fluorescence (normalized to the first time point) observed at 900 s, i.e. before  $\text{Ca}^{2+}$  addition **(C)**, and at 1,200 s, i.e. after  $\text{Ca}^{2+}$  addition **(D)**, in the trans-SNARE complex performed with WT or mutant Munc18-1 (corresponding to Fig. 4F). Bars represent averages of the normalized fluorescence intensities observed in three independent experiments. Error bars represent standard deviations. Statistical significance and p values were determined by one-way analysis of variance (ANOVA) with the Holm-Sidak test (\*\* $p < 0.001$ , \*\*  $p < 0.01$ ).

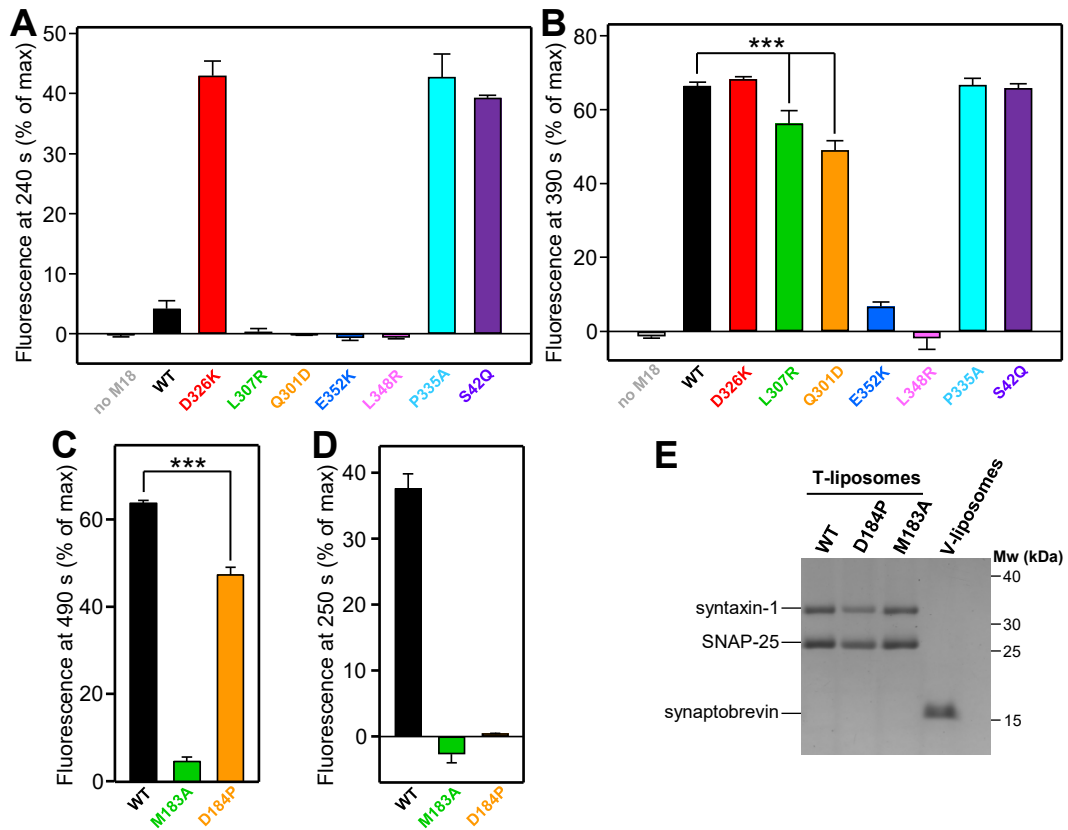

**Figure S11.** Quantification of the liposome fusion assays performed with different Munc18-1 and syntaxin-1 mutants. (**A-D**) Diagrams showing the relative fluorescence observed at 240 s, i.e. before  $\text{Ca}^{2+}$  addition (**A**), and at 390 s, i.e. after  $\text{Ca}^{2+}$  addition (**B**), in the content mixing assays performed with WT and mutant Munc18 (corresponding to Fig. 5B); at 490 s, i.e. after  $\text{Ca}^{2+}$  addition in the content mixing assays performed with WT Munc18-1 and WT or mutant syntaxin-1 (**C**) (corresponding to Fig. 5C); or at 250 s, i.e. before  $\text{Ca}^{2+}$  addition, in analogous assays performed with D326K mutant Munc18-1 and WT or mutant syntaxin-1 (**D**) (corresponding to Fig. 5D). Bars represent averages of the normalized fluorescence intensities observed in three independent experiments. Error bars represent standard deviations. Statistical significance and p values were determined by one-way analysis of variance (ANOVA) with the Holm-Sidak test (\*\*\*)  $p < 0.001$ ). (**E**) SDS-PAGE analysis of protein incorporation into V-liposomes and the T-liposomes containing WT or mutant syntaxin-1, which were used for the fusion assays of Fig. 5. The positions of the SNARE proteins are indicated on the left, and those of molecular weight markers on the right.

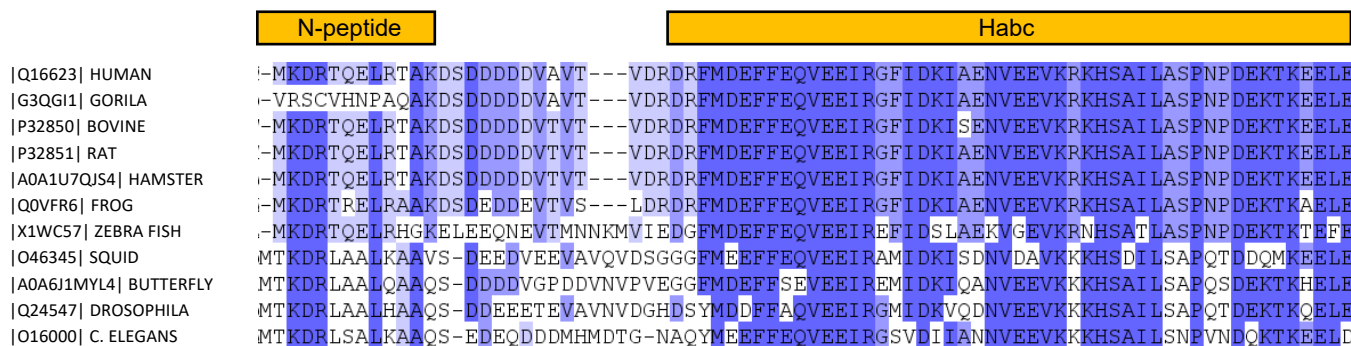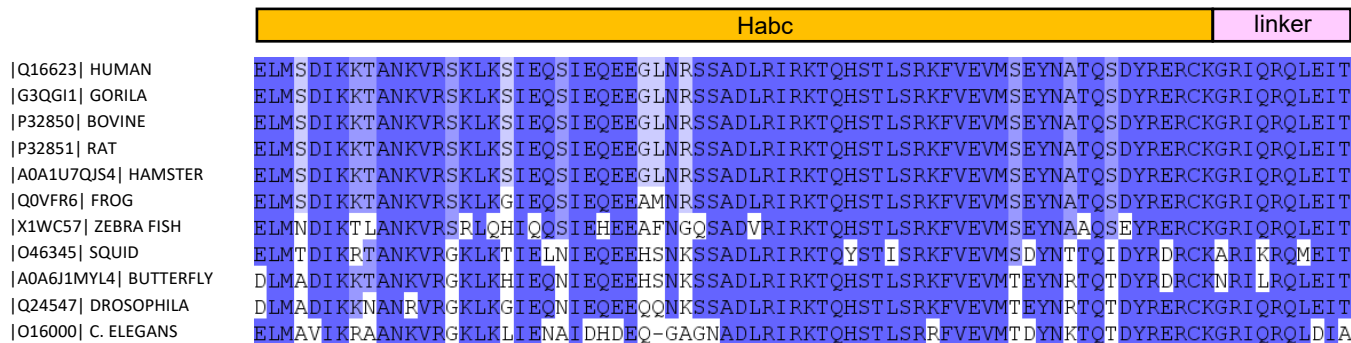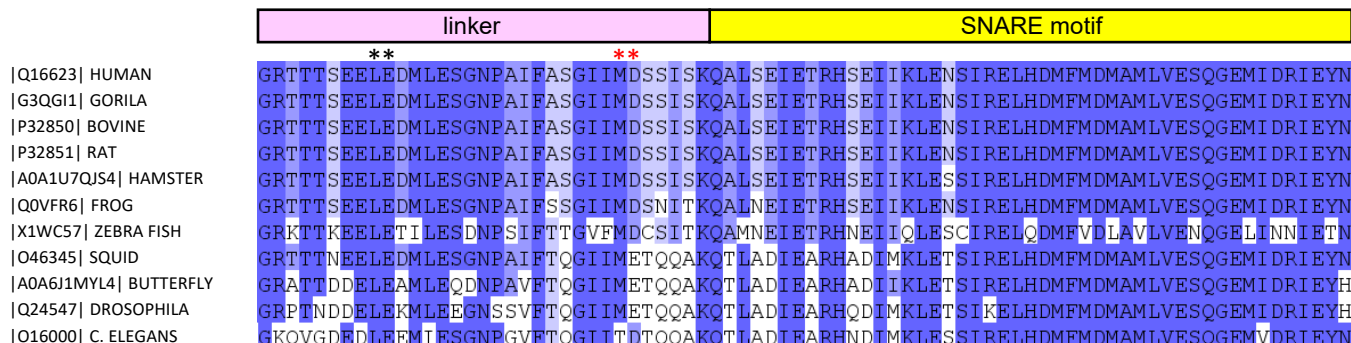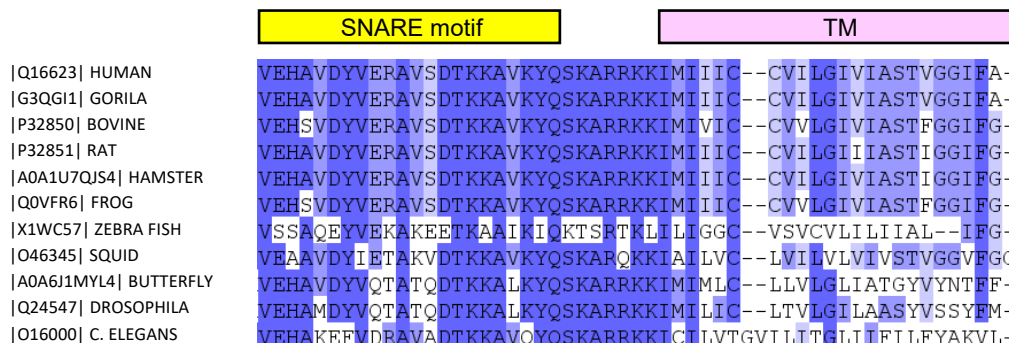

**Figure S12.** Sequence alignment of syntaxin-1A homologues from different species. The Uniprot (<https://www.uniprot.org>) code of each sequence and the common name of the species are indicated on the left. Conserved residues have a colored background. The color intensity reflects the degree of conservation. The domain diagram of syntaxin-1 with the same color code used in Fig. 1A is shown above the sequences. The positions of L165 and L166, which were mutated in the syntaxin-1 LE mutant, and of M183 and D184, the residues in the linker that were mutated, are indicated with \*.



## Supplementary Tables

**Table S1. Cryo-EM data collection, refinement, and validation statistics.**

|                                                     | class2    | class1    |
|-----------------------------------------------------|-----------|-----------|
| <b>Data collection and processing</b>               |           |           |
| Magnification                                       | 46,296    | 46,296    |
| Voltage (kV)                                        | 300       | 300       |
| Electron exposure (e <sup>-</sup> /Å <sup>2</sup> ) | 60        | 60        |
| Defocus range (μm)                                  | 1.6 – 2.6 | 1.6 – 2.6 |
| Pixel size (Å)                                      | 1.08      | 1.08      |
| Symmetry imposed                                    | C1        | C1        |
| Initial particle images (no.)                       | 5,819,182 | 5,819,182 |
| Final particle images (no.)                         | 345,463   | 331,649   |
| Map resolution (Å)                                  | 3.5       | 3.7       |
| FSC threshold                                       | 0.143     | 0.143     |
| <b>Refinement</b>                                   |           |           |
| Initial model used (PDB code)                       | 3C98      | 3C98      |
| Model composition                                   |           |           |
| Atoms                                               | 6472      | 6425      |
| Protein residues                                    | 807       | 806       |
| Ligands                                             | 0         | 0         |
| R.m.s. deviations                                   |           |           |
| Bond lengths (Å)                                    | 0.003     | 0.003     |
| Bond angles (°)                                     | 0.499     | 0.539     |
| <b>Validation</b>                                   |           |           |
| MolProbity score                                    | 1.50      | 1.63      |
| Clashscore                                          | 6.46      | 7.77      |
| Poor rotamers (%)                                   | 0.14      | 0.28      |
| Ramachandran plot                                   |           |           |
| Favored (%)                                         | 97.20     | 96.70     |
| Allowed (%)                                         | 2.80      | 3.30      |
| Disallowed (%)                                      | 0.00      | 0.00      |

**Table S2. Buried accessible surface areas (Å<sup>2</sup>) between different proteins and structural elements in class1, class2 and the Munc18-1-syntaxin-1 complex<sup>a</sup>**

|                     | Munc18-1<br>syntaxin-1 | Munc18-1<br>synaptobrevin | Munc18-1<br>SyxLE/Syb | syntaxin-1<br>synaptobrevin | syntaxin-1 H <sub>abc</sub> domain<br>syntaxin-1 SNARE motif |
|---------------------|------------------------|---------------------------|-----------------------|-----------------------------|--------------------------------------------------------------|
| class1              | 2810                   | 1412                      | 2097                  | 660                         | 509                                                          |
| class2              | 2743                   | 1413                      | 2067                  | 680                         | 438                                                          |
| SyxM18 <sup>b</sup> | 2703                   |                           |                       |                             | 1313                                                         |

<sup>a</sup>Buried solvent accessible surface areas were calculated using Pymol (Schrödinger, LLC) adding hydrogen atoms and using high sampling density, with the parameter dot\_solvent set to 1 and set dot\_density set to 3.

<sup>b</sup>Syntaxin-1-Munc18-1 complex (PDB code 3C98)

**Table S3. Summary of concentrations used for mass photometry experiments and measured  $K_D$ s<sup>a</sup>**

| Protein 1      | [Protein 1]  | Protein 2        | [Protein 2]  | $K_D$ (nM)        |
|----------------|--------------|------------------|--------------|-------------------|
| Munc18-1 WT    | 5 nM, 5 nM   | syntaxin-1 WT    | 2.5 nM, 5 nM | 3.3 ± 0.5         |
| Munc18-1 P335A | 5 nM, 5 nM   | syntaxin-1 WT    | 2.5 nM, 5 nM | 12.3 ± 1.1        |
| Munc18-1 S42Q  | 5 nM, 10 nM  | syntaxin-1 WT    | 5 nM, 5 nM   | 67.9 ± 4.3        |
| Munc18-1 WT    | 5 nM, 5 nM   | syntaxin-1 M183A | 2.5 nM, 5 nM | 0.6 ± 0.2         |
| Munc18-1 WT    | 5 nM, 5 nM   | syntaxin-1 D184P | 2.5 nM, 5 nM | 1.9 ± 0.2         |
| Munc18-1 D326K | 5 nM, 5 nM   | SyxLE/Syb        | 2.5 nM, 5 nM | 9.4 ± 0.2         |
| Munc18-1 WT    | 5 nM, 5 nM   | SyxLE/Syb        | 2.5 nM, 5 nM | 17.9 ± 1.0        |
| Munc18-1 D326K | 30 nM, 35 nM | SyxLE M183A/Syb  | 15 nM, 35 nM | n.d. <sup>b</sup> |
| Munc18-1 D326K | 30 nM, 35 nM | SyxLE D184P/Syb  | 15 nM, 35 nM | n.d. <sup>b</sup> |
| Munc18-1 P335A | 5 nM, 5 nM   | SyxLE/Syb        | 2.5 nM, 5 nM | 23.6 ± 4.0        |
| Munc18-1 S42Q  | 35 nM, 30 nM | SyxLE/Syb        | 35 nM, 15 nM | 267 ± 28          |
| Munc18-1 L307R | 20 nM, 20 nM | SyxLE/Syb        | 10 nM, 20 nM | 72.2 ± 1.7        |
| Munc18-1 Q301D | 20 nM, 20 nM | SyxLE/Syb        | 10 nM, 20 nM | 90.6 ± 5.2        |
| Munc18-1 E352K | 10 nM, 20 nM | SyxLE/Syb        | 10 nM, 10 nM | 97.8 ± 5.5        |
| Munc18-1 L348R | 20 nM, 30 nM | SyxLE/Syb        | 20 nM, 15 nM | 140 ± 137         |

<sup>a</sup>Six experiments were performed for each pair of proteins, 3 at the first concentrations indicated in the [Protein 1] and [Protein 2] columns, and 3 at the second concentrations listed. The six  $K_D$  values obtained were used to calculate the listed average  $K_D$  ± standard deviation.

<sup>d</sup>Binding was too weak to derive accurate  $K_D$ s (n.d. = not determined)
